# Supplementary material for: Himawari-8-derived diurnal variations of ground-level PM 2.5 pollution across China using a fast space-time Light Gradient Boosting Machine
Source: Copernicus journal article supplement (doi:10.5194/acp-2020-1277), 2021-01-06
Supplement: Supplementary file 1 [file acp-2020-1277-supplement.pdf]

## Supporting Information for

# **Himawari-8-derived diurnal variations of ground-level PM<sub>2.5</sub> pollution across China using a fast space-time Light Gradient Boosting Machine**

Jing Wei<sup>1,2\*</sup>, Zhanqing Li<sup>2\*\*</sup>, Rachel T. Pinker<sup>2</sup>, Lin Sun<sup>3</sup>, Wenhao Xue<sup>1</sup>, Runze Li<sup>1</sup>

1. State Key Laboratory of Remote Sensing Science, College of Global Change and Earth System Science, Beijing Normal University, Beijing, China
2. Department of Atmospheric and Oceanic Science, Earth System Science Interdisciplinary Center, University of Maryland, College Park, MD, USA
3. College of Geodesy and Geomatics, Shandong University of Science and Technology, Qingdao, China

Correspondence to: Jing Wei (weijing\_rs@163.com), Zhanqing Li (zli@atmos.umd.edu)

### **Contents of this file**

Tables S1-S3

Figures S1-S4

**Table S1.** Summary of data sources used in this study.

| Dataset           | Variable          | Content                    | Unit              | Spatial Resolution | Temporal Resolution | Data source            |
|-------------------|-------------------|----------------------------|-------------------|--------------------|---------------------|------------------------|
| PM <sub>2.5</sub> | PM <sub>2.5</sub> | PM <sub>2.5</sub>          | μg/m <sup>3</sup> | In situ            | Hourly              | CNEMC                  |
| AOD               | AOD               | Himawari-8 AOD             | -                 | 5 km × 5 km        | Hourly              | Himawari-8             |
| Meteorology       | ET                | Total evaporation          | mm                | 0.1°×0.1°          | Hourly              | ERA5                   |
|                   | SP                | Surface pressure           | hPa               | 0.1°×0.1°          |                     |                        |
|                   | TEM               | 2-m temperature            | K                 | 0.1°×0.1°          |                     |                        |
|                   | WU                | 10-m u-component of wind   | m/s               | 0.1°×0.1°          |                     |                        |
|                   | WV                | 10-m v-component of wind   | m/s               | 0.1°×0.1°          |                     |                        |
|                   | BLH               | Boundary layer height      | m                 | 0.25°×0.25°        |                     |                        |
|                   | RH                | Relative humidity          | %                 | 0.25°×0.25°        |                     |                        |
| Emission          | NH <sub>3</sub>   | Ammonia                    | Mg/grid           | 0.25°×0.25°        | Monthly             | MEIC                   |
|                   | NO <sub>x</sub>   | Nitrogen oxide             | Mg/grid           |                    |                     |                        |
|                   | SO <sub>2</sub>   | Sulfur dioxide             | Mg/grid           |                    |                     |                        |
|                   | VOC               | Volatile organic compounds | Mg/grid           |                    |                     |                        |
|                   | PM                | PMcoarse                   | Mg/grid           |                    |                     |                        |
| Land cover        | NDVI              | NDVI                       | -                 | 0.05°×0.05°        | Monthly             | MOD13C2                |
| Topography        | DEM               | Surface elevation          | m                 | 90 m × 90 m        | -                   | SRTM                   |
| Population        | POP               | Ambient population         | -                 | 1 km × 1 km        | Yearly              | LandScan <sup>TM</sup> |

**Table S2.** Annual and seasonal mean PM<sub>2.5</sub> concentrations (µg/m<sup>3</sup>) in 2018 in China, eastern China (ECHN), the Beijing-Tianjin-Hebei (BTH) region, the Yangtze River Delta (YRD) region, and the Pearl River Delta (PRD) region.

| Time   | China       | ECHN        | BTH         | YRD         | PRD        |
|--------|-------------|-------------|-------------|-------------|------------|
| Annual | 28.99±10.31 | 32.56±10.78 | 39.32±11.74 | 38.64±8.27  | 32.98±4.53 |
| Spring | 32.84±11.49 | 34.93±10.95 | 45.75±12.96 | 40.35±9.55  | 33.97±4.50 |
| Summer | 22.86±7.05  | 24.16±6.29  | 29.99±7.46  | 26.16±4.58  | 23.56±3.18 |
| Autumn | 23.76±10.97 | 28.64±11.60 | 35.98±11.20 | 35.97±7.80  | 29.54±4.43 |
| Winter | 39.04±16.32 | 48.34±17.47 | 48.36±18.92 | 57.41±16.88 | 43.92±8.56 |

**Table S3.** Comparison in model performance with previous studies in hourly PM<sub>2.5</sub> estimations from the Himawari-8 data in China (N = 162,840).

| Model     | Out-of-sample validation |       |       | Out-of-station validation |       |       |
|-----------|--------------------------|-------|-------|---------------------------|-------|-------|
|           | CV-R <sup>2</sup>        | RMSE  | MAE   | CV-R <sup>2</sup>         | RMSE  | MAE   |
| MLR       | 0.19                     | 24.17 | 22.89 | 0.19                      | 24.19 | 22.91 |
| GWR       | 0.39                     | 21.96 | 20.74 | 0.37                      | 22.42 | 21.02 |
| GAM       | 0.39                     | 19.09 | 18.64 | 0.36                      | 19.77 | 18.89 |
| LME       | 0.50                     | 18.91 | 17.34 | 0.48                      | 19.06 | 17.95 |
| Two-stage | 0.58                     | 17.60 | 15.71 | 0.54                      | 17.99 | 16.01 |
| STLG      | 0.85                     | 13.09 | 8.11  | 0.81                      | 14.63 | 9.29  |

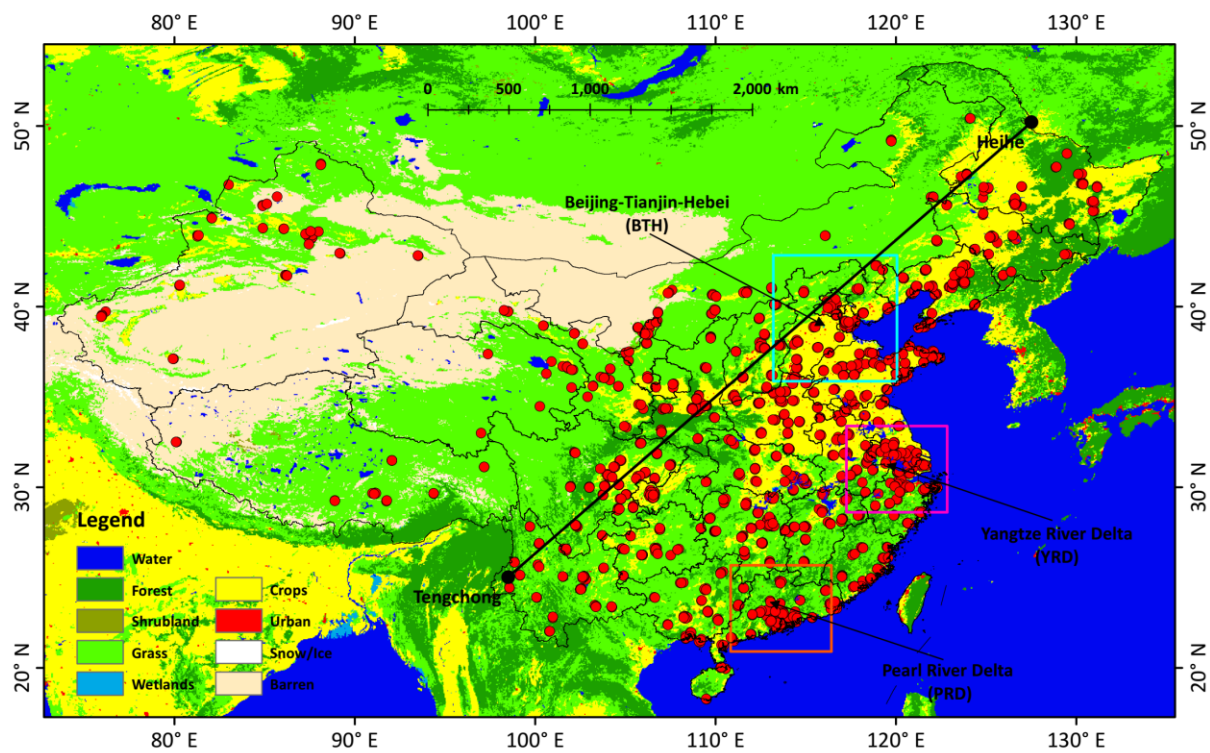

**Figure S1.** Spatial distribution of ground-based PM<sub>2.5</sub> monitoring stations in 2018 across China.

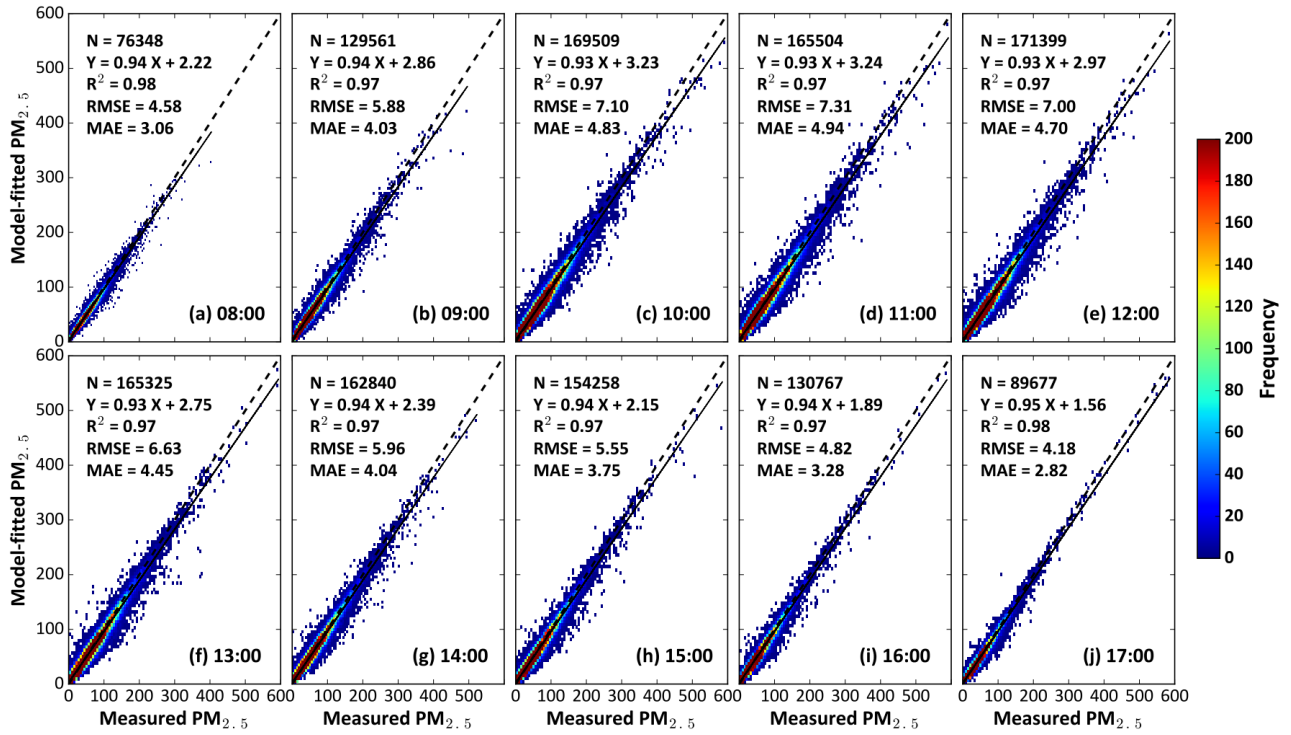

**Figure S2.** Density scatterplots of model-fitted hourly PM<sub>2.5</sub> concentrations for each hour from 08:00 to 17:00 local time in 2018 across China. Dashed lines denote 1:1 lines, and solid lines denote best-fit lines from linear regression.

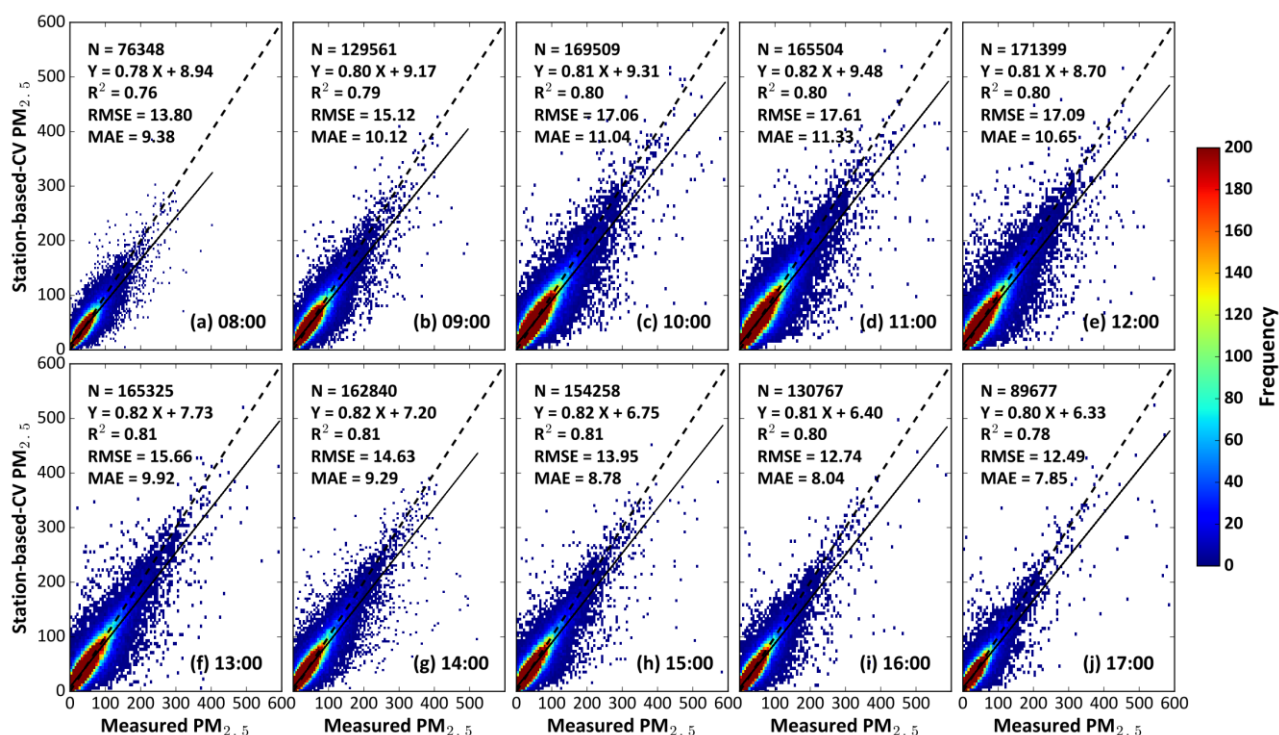

**Figure S3.** Density scatterplots of out-of-station cross-validation results of estimated hourly PM<sub>2.5</sub> concentrations (µg/m<sup>3</sup>) for each hour from 08:00 to 17:00 local time in 2018 across China. Dashed and solid lines denote 1:1 and best-fit lines from linear regression.

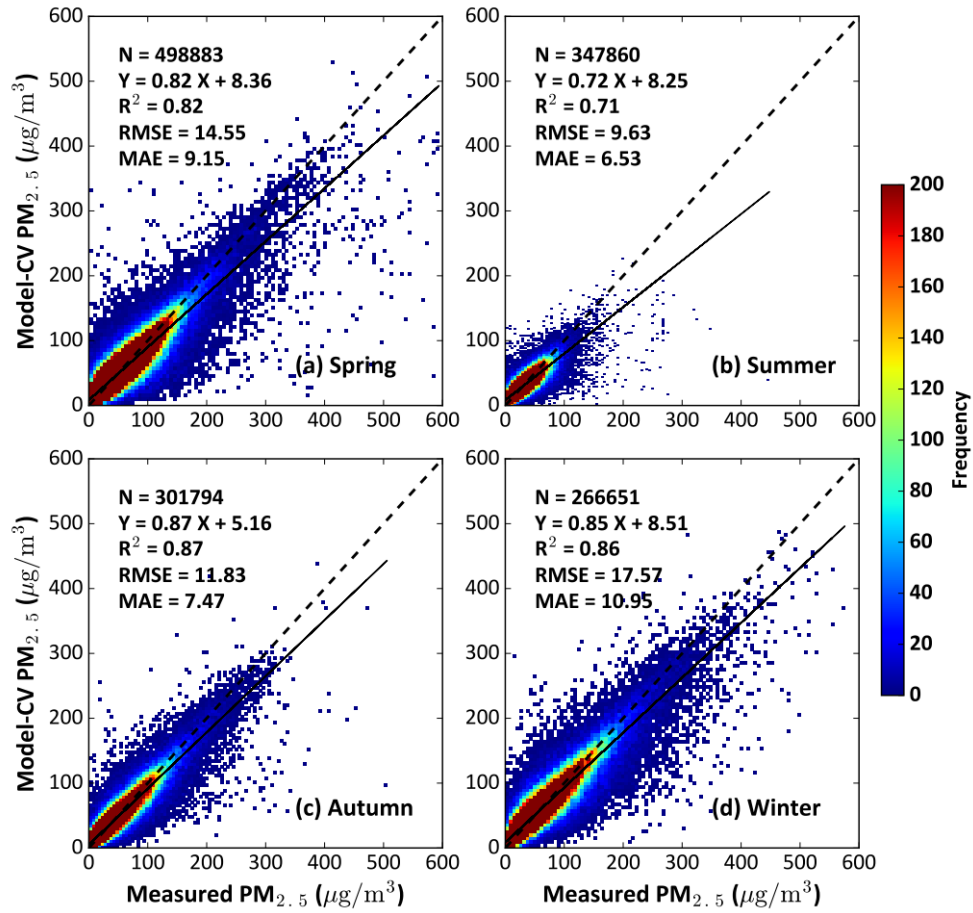

**Figure S4.** Density scatter plots of validation results of hourly PM<sub>2.5</sub> estimates for the four seasons in 2018 across China. Dashed and solid lines denote 1:1 and best-fit lines from linear regression.
